# Supplementary material for: Lebendige Hospizkultur im Pflegeheim entwickeln
Source: Springer Nature journal article supplement (doi:10.1007/s41906-022-1973-6), 2022-11-01
Supplement: MOESM1 [file 23716720]

## Literatur zum Beitrag „Lebendige Hospizkultur im Pflegeheim entwickeln“ von Martin Alsheimer

PflegeZeitschrift (75) 12/2022, S. 10-15

Afshar K, Müller-Mundt G, Schneider N (2016) Wie können Patienten mit chronisch fortschreitenden nicht-onkologischen Erkrankungen erkannt werden, bei denen eine Palliativversorgung sinnvoll ist? Eine Pilotstudie zur Erprobung des Supportive and Palliative Care Indicators Tool (SPICT) im Krankenhaus. Z Palliativmed. 17. 133–138

Alsheimer M. (2009) Gedenkfeiern für Angehörige gestalten. In: Praxis Palliative Care. Für ein gutes Leben bis zuletzt. Arbeitsheft für Praxis und Beratung: Tod und Trauer begleiten; H. 3, S. 17 - 24

Alsheimer M, Kern M, Montag T, et al (2005 ff): Palliative Care. Lehren. Lernen. Leben. Handreichung für die Ausbildung zur Alten-, Gesundheits- und Krankenpflege. <http://www.dgpalliativmedizin.de/pflege/palliative-care-lehren-lernen-leben.html> (Zugegriffen am: 01.11.2022)

Alsheimer M (2015) Leitlinien für Mutmacher. Gesprächsleitfaden für die Praxisanleitung. Altenpflege 7. 40–43

Alsheimer M (2020) Existenzielle Brücken. Rituale kreativ im Team gestalten. pflegen: palliativ 6. 29–31

Alsheimer M (2021) Warum gerade ich? Menschen in Krisen begleiten. In: Bromkamp P, Schrage B (Hrsg.) Unterwegs mit leichtem Gepäck. Altenheimseelsorge. eos, Sankt Ottilien, S. 174–185

BAG Hospiz (2006) Hospizkultur im Alten- und Pflegeheim. Indikatoren und Empfehlungen zur Palliativkompetenz [https://www.dgpalliativmedizin.de/images/stories/BAG\\_broschuere\\_hospizkultur-im-alten-u-pflegeheim.pdf](https://www.dgpalliativmedizin.de/images/stories/BAG_broschuere_hospizkultur-im-alten-u-pflegeheim.pdf) (Zugegriffen am: 01.11.2022)

CHV (2021) Palliative Care. Praktisch. Auf den Punkt. Informations- und Schulungsfilme in einfacher Sprache. <https://www.chv-ibb.org/filme> (Zugegriffen am: 01.11.2022)

DGP, DHPV, BÄK (2010) Charta zur Betreuung schwerstkranker und sterbender Menschen in Deutschland. [https://www.charta-zur-betreuung-sterbender.de/tl\\_files/dokumente/Charta\\_Broschuere.pdf](https://www.charta-zur-betreuung-sterbender.de/tl_files/dokumente/Charta_Broschuere.pdf) (Zugegriffen am: 01.11.2022)

Heimerl K (2011) Intelligente Pflegeheime: Palliative Care und Organisationsentwicklung im Alten- und Pflegeheim. In: Kojer M, Schmidl: Demenz und Palliative Geriatrie in der Praxis. Heilsame Betreuung unheilbar demenzkranker Menschen. Springer, Wien, New York, S. 187–197

Kaluza J, Töpferwein G (2005) Sterben begleiten. Zur Praxis der Sterbebegleitung durch Ärzte und Pflegende. Eine empirische Studie. trafo, Berlin

Kittelberger F, Gratz M, Rösch E (2017) Auf dem Weg zur Kooperationsvereinbarung. Kohlhammer, Stuttgart

Kojer M, Heimerl K (2010) Palliative Care ist ein Zugang für hochbetagte Menschen. Ein erweiterter Blick auf die WHO-Definition von Palliative Care. In: Heller A, Kittelberger F (Hrsg.) Hospizkompetenz und Palliative Care im Alter. Lambertus, Freiburg im Breisgau, S. 83–107

Lindemann D, Wasner M, Straßer B, Hagen T (2011) Christliche Hospiz- und Palliativkultur in Einrichtungen der stationären Altenhilfe, ambulanten Pflege und Behindertenhilfe. Ergebnisse der wissenschaftlichen Evaluation im Rahmen des Projektes Christliche Hospiz- und Palliativkultur (Kurzfassung) Caritasverband, München  
[https://www.palliative-praxis-schulung.de/wp-content/uploads/2013/07/caritas\\_muenchen.pdf](https://www.palliative-praxis-schulung.de/wp-content/uploads/2013/07/caritas_muenchen.pdf)  
(Zugegriffen am: 01.11.2022)

Müller M, Kessler G (2000) (Hrsg.) Implementierung von Hospizidee und Palliativmedizin in die Struktur und Arbeitsabläufe eines Altenheimes. Pallia Med, Bonn

Orth C, Alsheimer M (2005) „... Nicht sang- und klanglos gehen.“ Abschlussbericht über die Implementierungsphase von palliativer Versorgung und Hospizidee im Alten- und Pflegeheim Leonhard-Henninger-Haus. Bayerische Stiftung Hospiz (Arbeitshilfen 5), München, Bayreuth

Rösch E, Alsheimer M, Kittelberger F (2017) PallExcellence©. Der Nachweis von Hospizkultur und Palliativkompetenz in stationären Einrichtungen. Kohlhammer, Stuttgart

Schneider W, Dill H, Gmür W (2018) Sterben zuhause im Heim (SiH). Hospizkultur und Palliativkompetenz in der stationären Langzeitpflege. Universität Augsburg. Zentrum für Interdisziplinäre Gesundheitsforschung.  
[https://www.bundesgesundheitsministerium.de/fileadmin/Dateien/5\\_Publikationen/Pflege/Berichte/SiH\\_Sachbericht\\_413u415\\_FINAL\\_2018-05-22.pdf](https://www.bundesgesundheitsministerium.de/fileadmin/Dateien/5_Publikationen/Pflege/Berichte/SiH_Sachbericht_413u415_FINAL_2018-05-22.pdf) (Zugegriffen am: 01.11.2022)

Schwenk G, et al (2014) Im Leben und im Sterben begleiten. Palliativversorgung: Konzept und Beispiel. Broschüre Caritasverband München-Freising  
<https://www.caritas-nah-am-naechsten.de/cms-media/media-1039020.pdf> (Zugegriffen am: 01.11.2022)

Schwinger A, et al. (2022). Krankenhausaufenthalte von Pflegeheimbewohnenden am Lebensende: Eine empirische Bestandsaufnahme. In: Jacobs K, Kuhlmeier A, Greß S, Klauber J, Schwinger A (Hrsg.) Pflege-Report 2022. Springer, Berlin, Heidelberg.  
[doi:10.1007/978-3-662-65204-6\\_4](https://doi.org/10.1007/978-3-662-65204-6_4) (Zugegriffen am: 01.11.2022)
