# Supplementary material for: Lebendige Hospizkultur im Pflegeheim entwickeln
Source: Springer Nature journal article supplement (doi:10.1007/s41906-022-1973-6), 2022-11-01
Supplement: MOESM2 [file 23716720]

## Abbildung 2 zum Beitrag „Lebendige Hospizkultur im Pflegeheim entwickeln“ von Martin Alsheimer

PflegeZeitschrift (75) 12/2022, S. 10-15

### Projektplanung: 7 Stufen, 20 Aufgaben

| Stufen                                                                                                                                                                                                                                                           | Aufgaben                                                                                                                                                                                                                                                                                                                                                                                                                                                                                                                                                                       |
|------------------------------------------------------------------------------------------------------------------------------------------------------------------------------------------------------------------------------------------------------------------|--------------------------------------------------------------------------------------------------------------------------------------------------------------------------------------------------------------------------------------------------------------------------------------------------------------------------------------------------------------------------------------------------------------------------------------------------------------------------------------------------------------------------------------------------------------------------------|
| <b>Nachhaltigkeit sichern</b><br>Die Weiterentwicklung des Konzeptes in der Einrichtung zukünftig sichern durch Personen (z.B. Palliativbeauftragte) und Besprechungsformen (z.B. Palliative Fallbesprechungen, regelmäßige Nachbesprechungen nach Sterbefällen) | 7                                                                                                                                                                                                                                                                                                                                                                                                                                                                                                                                                                              |
| <b>Neue Räume beziehen und ausprobieren</b><br>Ideen ausprobieren, Wirksamkeit erleben lassen, Zwischenbilanzen und Erfolgskontrollen machen, Erfolge „feiern“                                                                                                   | 6 <ul style="list-style-type: none"> <li>Erfahrungen einholen</li> <li>Konsequenzen beraten</li> </ul>                                                                                                                                                                                                                                                                                                                                                                                                                                                                         |
| <b>Kooperationspartner (Angehörige, Ärzte, ambulante Hospizdienste, SAPV, Rettungsdienst) gewinnen, einbeziehen und externe Ressourcen nutzen:</b><br>Gemeinsame Fortbildungsangebote, Kontaktpflege, Beratungsformen                                            | 5 <ul style="list-style-type: none"> <li>Partner informieren</li> <li>Organisatorische und persönliche Verbindungen gezielt ausbauen</li> </ul>                                                                                                                                                                                                                                                                                                                                                                                                                                |
| <b>Mitarbeiter*innen aller Bereiche mitnehmen, beteiligen und befähigen</b><br>Teambesprechungen, Inhouse-Schulungen                                                                                                                                             | 4 <ul style="list-style-type: none"> <li>Entworfen Standards und ihre Umsetzung im gesamten Team diskutieren</li> <li>Vorschläge aus dem Team aufnehmen</li> <li>Notwendiges Wissen und Können schulen (= interne Fortbildungen)</li> </ul>                                                                                                                                                                                                                                                                                                                                    |
| <b>Ein tragfähiges Baugerüst entwickeln</b><br>Projektarbeit                                                                                                                                                                                                     | 3 <ul style="list-style-type: none"> <li>Leitlinien ausformulieren</li> <li>Vorhandene Standards überprüfen und verbessern</li> <li>Neue Standards entwickeln</li> <li>Auf Umsetzbarkeit (zeitlich, personell) überprüfen</li> <li>Einzelne Elemente im Kleinen erproben lassen</li> </ul>                                                                                                                                                                                                                                                                                     |
| <b>Die vorhandene Bausubstanz prüfen</b><br>Ist-Analyse                                                                                                                                                                                                          | 2 <ul style="list-style-type: none"> <li>Ist-Analyse: Systematisch und umfassend bisherige Praxis reflektieren und würdigen: Womit sind wir zufrieden? Was belastet organisatorisch / persönlich?</li> <li>Arbeitsprogramm für Projektgruppe entsprechend aufstellen</li> <li>Projektgruppe bilden (Kerngruppe mit evtl. externen Mitgliedern, punktuelle Gäste)</li> <li>Zukunftsbild „Palliativversorgung“ entwerfen (Elemente für Leitlinien, Ziele „messbar“ markieren)</li> </ul>                                                                                         |
| <b>Vorbereiten</b>                                                                                                                                                                                                                                               | 1 <ul style="list-style-type: none"> <li>Projektentwurf: Wer gehört "mit ins Boot"? Ähnliche Modelle sichten, Infos sammeln, Potentielle Partner/Träger sensibilisieren, ihre Bereitschaft erkunden, evtl. motivieren</li> <li>Finanzierung des Projektes sichern, Zeitrahmen und Schritte grob abstecken</li> <li>Instrumente des Projektes klären (z.B. Schulungsprogramm, Struktur Projektgruppe, Projektleitung, Besprechungen, Fortbildungen, begleitende Maßnahmen)</li> <li>Mitarbeitern Projekt vorstellen und dafür motivieren, Öffentlichkeit informieren</li> </ul> |
